# Supplementary material
Source: publisher figshare collection journal article supplement (https://acs.figshare.com/ndownloader/files/4630192)

## SUPPORTING INFORMATION.

Triazolopyrimidine-based dihydroorotate dehydrogenase inhibitors with potent and selective activity against the malaria parasite, *Plasmodium falciparum*

Margaret A. Phillips, Ramesh Gujjar, Nicholas A. Malmquist, John White, Farah El Mazouni, Jeffrey Baldwin, Pradipsinh K. Rathod

**Content:** HPLC traces demonstrating purity of compounds 6 and 19.

Figure 1S. A. HPLC trace for compound 7. B. HPLC trace for compound 20. Purified compounds eluted as single peak, and these peak fractions had the expected *Pf*DHODH inhibitor activity ( $IC_{50}$  = 0.05 and 0.1  $\mu$ M respectively). The HPLC method is described in the Experimental Section.

A.

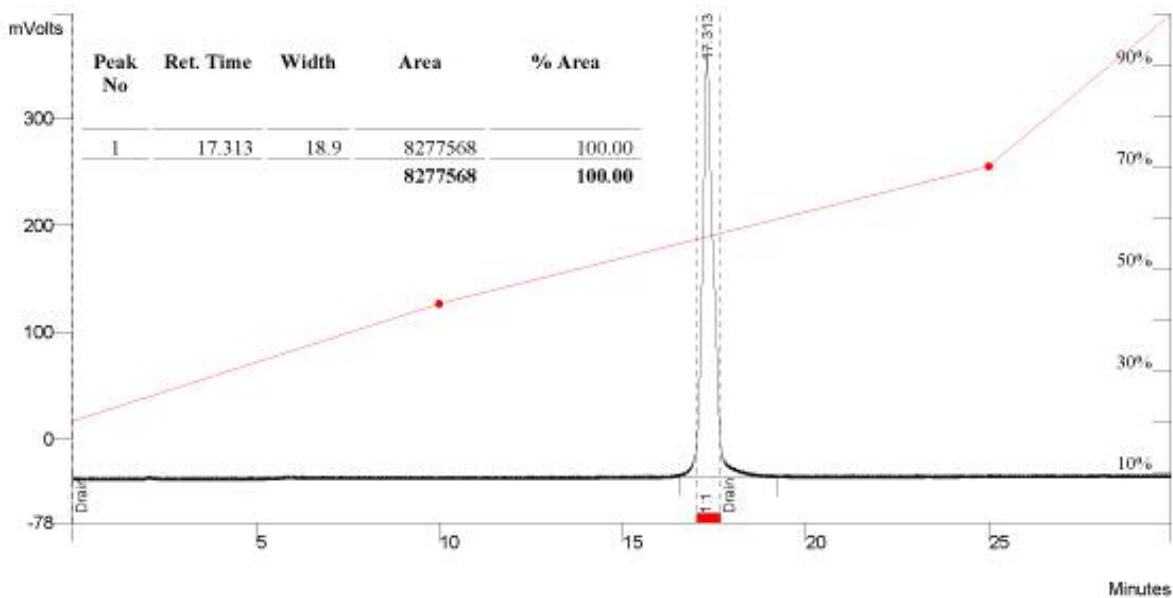

B.

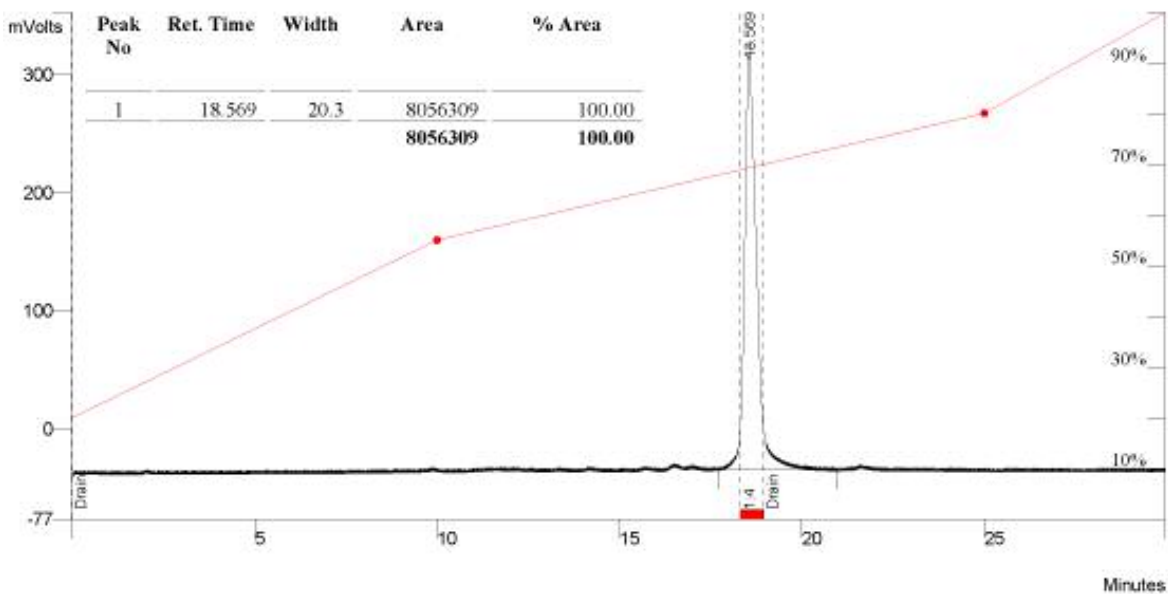

Supplement: Supplementary file 1 [file 4630192]
